# Supplementary material for: Identification of candidate reference genes for qRT-PCR normalization studies of salinity stress and injury in Onchidium reevesii
Source: PeerJ. 2019 Apr 26;7:e6834. doi: 10.7717/peerj.6834 (PMC6487802; doi:10.7717/peerj.6834)
Supplement: Table S1 [file peerj-07-6834-s003.xlsx]

## Sheet: Six tissues
	CYC	RPL28S	ACTB	TUBB	EF1a	Ubiq	18s
dorsal skin muscle	30.0032	27.6849	18.7482	22.4027	19.3448	30.275	21.4507
intestine	27.8779	27.2963	23.7217	22.8379	19.1733	29.9569	20.0812
lip	28.37	28.0404	20.2679	22.9699	20.1078	30.552	21.2658
pleopod	27.9377	26.8846	19.4557	21.7429	19.1015	30.7812	24.4165
liver pancreas	29.945	28.9184	26.9144	24.0356	21.3536	31.8964	23.5057
gonad	29.5984	27.7984	23.8649	24.4008	19.3926	33.0943	25.18

## Sheet: 0 ppt
	CYC	RPL28S	ACTB	TUBB	EF1a	Ubiq	18s
2h	31.463	30.73	23.336	28.75	29.697	38.125	33.094
4h	30.625	30.717	22.587	26.647	27.157	36.535	33.251
12h	33.111	31.333	22.569	27.587	28.101	37.1591	31.519
24h	29.128	31.552	22.433	27.404	27.747	36.5934	32.194
48h	35.738	32.754	24.982	30.026	30.359	36.4715	33.545
96h	31.743	31.556	22.974	27.423	27.494	33.234	32.979
7D	33.491	33.003	23.904	28.83	29.804	35.4248	32.011

## Sheet: 5 ppt
	CYC	RPL28S	ACTB	TUBB	EF1a	Ubiq	18s
2h	33.137	32.034	24.792	28.01	29.826	37.7887	32.487
4h	28.871	29.557	21.439	25.368	26.776	36.0183	31.9896
12h	31.852	29.782	21.8261	26.2676	28.1283	36.1299	31.8402
24h	34.122	29.6513	22.5108	26.0446	28.3404	34.0904	31.9953
48h	38.6721	33.9387	27.0754	32.1189	32.0047	30.0095	34.169
96h	34.0841	29.509	23.5452	26.6024	27.1288	36.127	31.4325
7D	32.0881	29.9073	22.7083	26.6397	27.4694	36.1033	31.063

## Sheet: 15 ppt
	CYC	RPL28S	ACTB	TUBB	EF1a	Ubiq	18s
2h	20.8451	27.0189	19.614	23.4202	20.3321	31.4604	20.9176
4h	20.232	27.4974	19.4021	22.9139	20.2947	30.4881	20.5051
12h	20.6592	27.8043	19.3779	22.9573	19.901	31.5612	20.947
24h	20.1793	26.9492	18.4064	21.9111	19.1679	29.8326	20.6969
48h	20.9548	27.8348	19.7196	22.386	19.4866	30.4113	21.3929
96h	20.7986	28.023	19.8903	22.9586	20.082	31.1372	22.4621
7D	20.4502	27.3359	19.3478	22.9514	19.949	30.0817	21.5897

## Sheet: 25 ppt
	CYC	RPL28S	ACTB	TUBB	EF1a	Ubiq	18s
2h	22.0802	27.4922	19.1893	19.4398	18.079	31.2912	19.3372
4h	22.407	28.4361	19.2707	19.544	18.8714	31.6336	19.7148
12h	20.7643	27.3025	19.1364	19.0914	17.5002	31.3212	21.96
24h	21.6151	28.2205	19.2132	20.5361	18.2799	31.6576	20.69
48h	22.9926	28.6161	20.5963	21.8627	19.8515	31.8966	25.2526
96h	22.3776	27.3857	19.2455	21.1704	18.5587	31.1044	19.7112
7D	23.395	26.8183	19.4603	20.9707	18.2941	31.5925	19.3242

## Sheet: 35 ppt
	CYC	RPL28S	ACTB	TUBB	EF1a	Ubiq	18s
2h	24.4666	27.3016	18.1087	22.6307	20.4831	28.3427	31.9332
4h	24.5151	27.4957	16.8297	21.5138	21.3058	30.0514	24.375
12h	24.9018	28.1113	18.9404	21.7905	21.216	29.1313	23.9975
24h	24.2021	26.8112	19.0482	21.4658	19.2411	29.9461	27.6935
48h	23.7919	25.9004	19.4586	21.3	19.6355	30.1193	21.0106
96h	25.2298	26.6578	19.2215	22.1112	19.0527	30.1957	17.9772
7D	23.6577	26.9757	20.1271	21.6405	21.4839	31.2664	18.8005

## Sheet: injury
	CYC	RPL28S	ACTB	TUBB	EF1a	Ubiq	18s
2h	27.0139	28.19	18.8209	23.7968	20.3158	31.6786	23.1187
4h	28.3203	27.6009	17.3812	22.1337	18.6648	29.235	21.1526
12h	26.2418	27.6995	18.5436	22.3227	19.1164	29.445	21.9955
24h	24.6102	26.6639	19.1731	22.0597	18.6602	29.692	21.52
48h	23.2777	26.5006	18.914	21.7054	18.2061	27.597	20.4704
96h	24.32	27.3181	19.6708	22.6067	19.3634	30.1957	19.928
7D	23.4928	26.069	18.8244	21.519	18.2187	31.2664	19.0259

## Sheet: different weight
	CYC	RPL28S	ACTB	TUBB	EF1a	Ubiq	18s
8g	23.8247	25.1757	19.6919	22.4959	20.3292	29.8037	21.7851
11g	23.9869	25.7293	19.0858	22.159	20.06	30.308	25.1324
15g	24.4135	25.8939	18.6271	21.8235	19.7564	28.4491	24.9557
18g	25.4243	30.821	24.1088	27.8459	27.8133	32.4626	31.5904
22g	25.6823	30.973	23.0782	27.5168	27.5168	34.4241	32.0697
